# Supplementary material for: Der f 38 Is a Novel TLR4-Binding Allergen Related to Allergy Pathogenesis from Dermatophagoides farinae
Source: Int J Mol Sci. 2021 Aug 5;22(16):8440. doi: 10.3390/ijms22168440 (PMC8395149; doi:10.3390/ijms22168440)
Supplement: Supplementary file 1 [file ijms-22-08440-s001.zip › ijms-1310593-supplementary.pdf]

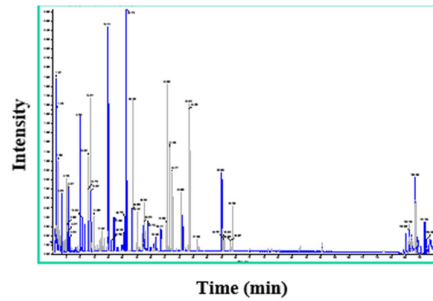

**Figure S1. Identification of native Der f 38.** Mass spectrum of natural Der f 38 protein after chymotrypsin treatment. The Q-TOF method (ABSciex TripleTOF 5600+) was used for the analysis of Der f 38. X-axis shows the mass/charge ratio and Y-axis represents signal intensity.

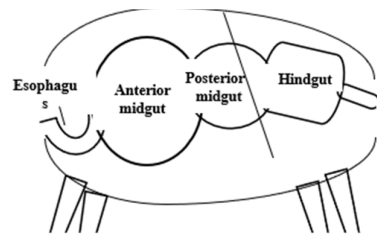

**Figure S2. Illustration of the digestive system of DF.** Line indicates the region cut from the digestive tract in electron microscopy.

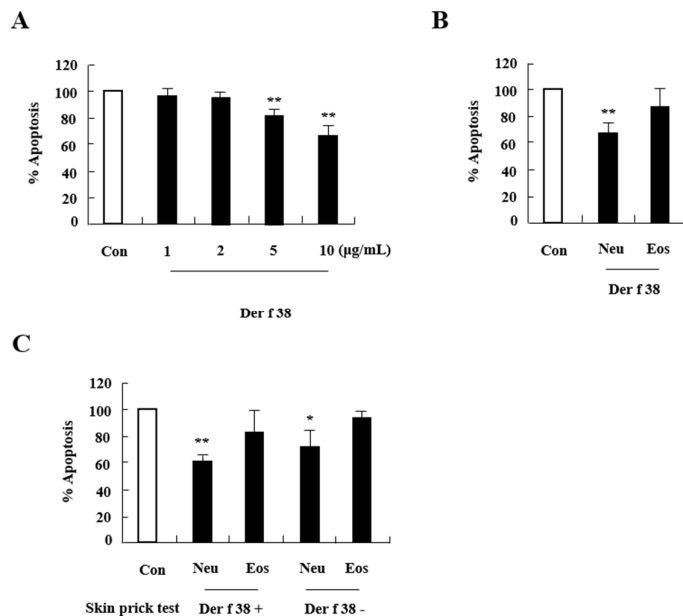

**Figure S3. Der f 38 inhibits apoptosis of neutrophils and eosinophils.** (A) Normal neutrophils were incubated with Der f 38 at the indicated concentration for 24 h. (B) After treatment with Der f 38 (10 µg/mL), % apoptotic rate of neutrophils and eosinophils of normal (n = 3) was combined with that of allergic subjects (n = 8), respectively. (C) Data from allergic subjects (n = 8) were divided into Der f 38-positive (n = 6) or -negative (n = 2) results based on skin prick test. \*,  $p < 0.05$ ; \*\*,  $p < 0.01$ , significant difference between untreated and Der f 38-treated groups.

**Supplementary Table S1. Characteristics of normal and allergic subjects**

|                                  | Normal                   | Allergy                     |
|----------------------------------|--------------------------|-----------------------------|
| Number of subjects (female/male) | 20 (15/5)                | 20 (15/5)                   |
| Age (years)                      | 23.9 ± 5.0 (20~41)       | 23.9 ± 5.8 (20~48)          |
| RBC (10 <sup>6</sup> /μL)        | 4.6 ± 0.3 (4.0~5.4)      | 4.8 ± 0.4 (4.3~5.8)         |
| Platelet (10 <sup>3</sup> /μL)   | 294.3 ± 52.7 (220~384)   | 301.0 ± 79.6 (149~483)      |
| WBC (10 <sup>3</sup> /μL)        | 6.4 ± 1.4 (4.5~9.3)      | 6.8 ± 1.1 (4.4~8.5)         |
| Neutrophil (%)                   | 56.2 ± 8.0 (36.4~72.1)   | 56.9 ± 8.5 (35.8~66.1)      |
| Lymphocyte (%)                   | 36.2 ± 7.8 (27.2~58.4)   | 33.0 ± 6.9 (22.8~47.7)      |
| Monocyte (%)                     | 6.4 ± 1.4 (3.7~9.4)      | 7.4 ± 1.9 (5.1~11.8)        |
| Eosinophil (%)                   | 1.2 ± 0.8 (0.2~2.8)      | 2.0 ± 1.0 (0.6~3.7)         |
| Basophil (%)                     | 0.4 ± 0.2 (0.1~0.9)      | 0.5 ± 0.2 (0.1~0.9)         |
| Total IgE (ng/mL)                | 81.8 ± 22.7 (55.3~121.4) | 691.6 ± 552.8 (42.4~1594.5) |
